# Supplementary material for: IL-27 limits HSPC differentiation during infection and protects from stem cell exhaustion
Source: eLife. 2025 Dec 15;14:RP105876. doi: 10.7554/eLife.105876 (PMC12705068; doi:10.7554/eLife.105876)
Supplement: Source data 1. [file elife-105876-data1.xlsx]

## Sheet: Sheet1
Figure 1
Panel B
LTHSC	Naive	5dpi
	5.71	9.89
	5.98	11.9
	6.82	30.6
Panel C
Monocyte	Spleen		PEC
	Naive	Infected	Naive	Infected
	9.35	13.2	22.7	88.7
	7.77	20.5	30.1	89.5
	12	40.1	29.7	99.5
Panel E
LTHSC	DPI	WT				p28 KO
	0	4020	4750	2540	3120	2490	2920	4920	3420
	3	2080	3390	4300		1880	2800	5000
	5	5830	5770	6160	6080	6020	6960	6550	8580
	10	4600	1960	1960		2070	2130	1750
GP	DPI	WT				p28KO
	0	29100	79000	51700		64500	60400	45000
	3	24100	61500	42900		53800	43000	36900
	5	74900	134000	81100		92800	84700	67900
	10	96200	164000	131000	153000	94300	136000	138000	111000
Panel F
MP	DPI	WT				p28KO
	0	1230	8450	3350		5200	9540	6870
	3	2000	9110	11600		10800	20700	17500
	5	577	8950	4840		14800	15600	15300
	10	4940	540	1840	2580	2990	3350	2230	3150
Figure 1-figure supplement 1
Panel A
MDP	Naive	5dpi
	1.62	5.12
	1.19	2.71
	1.04	9.18
Mono	Naive	5dpi
	1.12	2.6
	1.28	4.42
	1.35	11.9
Neut	Naive	5dpi
	1.07	1.32
	1.25	2.39
	0.92	6.7
Panel B
CCR2 hi CX3CR1 lo mono	Naive	5dpi	Naive	5dpi
	5.56	9.98	0	75
	1.32	12.1	0	79.7
	3.77	45.4	33.3	99.6
CCR2 lo CX3CR1 hi mono	Naive	5dpi	Naive	5dpi
	9.66	21	26.5	88.3
	9.26	32.5	37.5	90.9
	12.6	61.6	35.4	99.5
Panel C
MDP	DPI	WT				p28 KO
	0	192	278	352	435	449	489	501	537
	3	3260	2640	5090		4940	5590	10400
	5	456	710	780	584	2240	3110	2700	3240
	10	3580	2260	5210		3150	5460	3720
Panel D
Monocytes	DPI	Liver-WT				Liver-IL-27p28 -/-
	0	141000	302000	190000		476000	260000	233000
	3	284000	624000	443000		892000	527000	558000
	5	686000	1640000	1870000		2330000	2240000	2360000
	10	2640000	2860000	3270000	2860000	4040000	4360000	4950000	2860000
Panel E
IV (-) Mono	DPI	Liver-WT				Liver-IL-27p28 -/-
	0	9390	18000	10700		82900	27500	23600
	3	14200	47900	43300		84500	63400	97800
	5	224000	626000	816000		637000	930000	998000
	10	1000000	1780000	2120000	1910000	2530000	2750000	2900000	1910000
CCR2 hi CX3CR1 lo Mono	DPI	Liver-WT				Liver-IL-27p28 -/-
	0	409	610	237		3020	1220	954
	3	74400	146000	114000		171000	54500	225000
	5	37800	113000	101000		118000	123000	124000
	10	821000	696000	961000	1050000	1570000	1550000	1690000	1120000
Panel F
	Isotype	anti-p28
	122000	173000
	129000	120000
	196000	65200
Figure 2
Panel A
MP	27R fl/fl	CD4-27R fl/fl
	10.3	2.54
	8.55	8.91
	19.7	3.68
		14.2
		24.8
Panel C
LTHSC	WT Donor	KO Donor	WT in Mix	KO in Mix
	96.9	98.9	42.6	54.7
	98.3	83.7	60.7	38.4
	94.5	91.7	51.3	47.9
	95.2	93	73.6	25.4
		88.5	64.4	34.9
MP	WT Donor	KO Donor	WT in Mix	KO in Mix
	99.4	100	41.4	54.6
	99.7	100	48.6	51.1
	99.2	97.3	50	48.8
	100	99.5	65.2	34.2
		98.1	44	50
Panel D
Spleen CCR2 hi CX3CR1 lo mono	WT Donor	KO Donor	WT in Mix	KO in Mix
	98.6	99.7	41.7	58.3
	97.4	96.5	35.4	62.8
	99.2	99.3	41.5	58.1
	98		42.9	56.8
			29.9	70
Figure 2-figure supplement 1
Panel B
T cells	Weeks post transplant	WT										KO
	4	28.1	14.4	11.4	20.2	21.9	31.9	3.78	22.9	11.2	20.4	15.1	20.7	21.6	15.2	14.7	19.8	4.27	27.5	15.4	16.8
	10	46.1	46	51.7	48.3	50	39.5	49.8	53.8	48.1		39.1	34.9	29.8	33.4	39.1	32.1	36.7	26	35.9
	14	56.4	46.8	55.5	59.7	55.8						36.3	32.9	33.3	24	31.5
B cells	Weeks post transplant	WT										KO
	4	48.3	49.4	50.4	38.9	44	49.4	48.4	48	49.8	49.1	51.2	49.9	49	59.8	55.1	50	51.2	51.6	49.7	50.5
	10	52	59.5	54.2	45.7	49.2	51.7	51.2	58.9	53.1		47.7	40.4	45.6	54	50.6	48	48.4	40.9	46.8
	14	60.4	64.4	66.2	75.9	66.9						29.5	27.2	24.8	16.5	25.7
Panel C
LTHSC	WT Donor	KO Donor	WT in Mix	KO in Mix		DLA123
	100	97.9	86.7	12.9
	99.7	98.9	59.1	40.7
	99.6	96.8	65.9	33.9
		98.9	49.8	50.2
		98.3	69.5	26.2
MP	WT Donor	KO Donor	WT in Mix	KO in Mix
	100	99.2	56.3	42.6
	98.6	100	63.7	36
	98.9	100	48.3	50.3
		100	68.5	31.2
		100	75.4	24.1
Panel D
Spleen	WT Donor	KO Donor	WT in Mix	KO in Mix
	99.5	96.4	23.3	75.1
	99.5	96.2	54.1	42.9
	99.5	98.2	14.5	84
	98.6	94.4	40.6	58.9
		96.9	46.4	52.3
Liver	WT Donor	KO Donor	WT in Mix	KO in Mix
	99.8	87.7	19.3	78.5
	99.8	88.9	45.2	52.3
	99.9	91.9	11.9	84.9
	100	90.5	41.1	55.9
		90.3	40.1	57.5
Figure 3
Panel A	DPI	BM wash				BM culture
	0	44.341	33.2615	17.5288		0	0	0
	3	80.261	84.8589	92.2128	62.7755	1.7036	13.8178	7.30935	1.7036
	5	105.075	110.584	101.401	90.3746	27.7146	36.033	38.8034	30.4887
	10	93.1318	75.6617	91.2937	106.911	24.0135	21.2357	31.4131	25.8644
Panel B
% GFP+ cells in BM	DPI	T cells				B cells				Neutrophils				Monocytes				Macrophages				DC1				DC2
	0	24.6	33.1	32.3		1.88	1.22	2.79		3.18	2.5	1.87		34.2	22	23.8		5.33	5.39	4.25		0	0	0		0.19	0.21	0.32
	5	0.98	3.62	16.3	4.93	1.28	1.08	2.07	2.79	29.9	29.4	14.2	11.4	44.9	39	39.9	62.3	1.2	2.41	2.86	1.06	0	0.042	0.022	0	0.00774	0.083	0.065	0.034
	10	3.92	9.13	3.32	4.1	9.38	9.41	7.77	6.44	6.58	7.69	7.51	5.85	62.4	46.7	66.3	68	0.53	1.72	0.27	0.56	0	0.014	0	0	0.00796	0	0	0
Panel C		Spleen				BM				Blood
# of GFP+ cells by tissue	0	613000	518000	411000		216000	145000	262000		35700	6790	5870
	5	618000	434000	272000	555000	458000	140000	168000	193000	146000	26100	52700	200000
	10	5930000	2160000	8400000	7260000	451000	273000	260000	396000	722000	631000	388000	262000
		T cells				B cells				Neutrophils				Monocytes				Macrophages				DC1				DC2
% GFP+ cells in Blood	0	0	0	0.29		3.35	7.69	7.56		0.24	0	0		39.2	12.5	19.2		34	53.6	44.8		0	0	0		1.2	0.85	0.87
	5	2.88	1.62	2.35	1.29	3.33	11.7	12.4	7.61	0.57	0.9	0.59	0.23	68.2	57.5	49.4	67.4	11.4	10.7	21.8	12.5	0.038	0	0	0	0.11	0.065	0	0.12
	10	4.66	9.09	6.78	9.23	9.73	3.27	7.59	14.2	1	4.18	1.52	1.07	68	50.5	67.4	55.2	2.22	6.73	1.32	1.5	0	0	0	0	0	0	0	0
% GFP+ cells in Spleen		T cells				B cells				Neutrophils				Monocytes				Macrophages				DC1				DC2
	0	36.6	22.1	30.2		5.7	10	4.9		0.065	0.055	0.026		20.1	9.75	13.1		14.5	23.3	18.8		1.02	1.55	1.28		0.33	0.72	0.68
	5	4.58	1.74	5.14	3.16	11.4	12.7	15.6	15	5.21	2.85	2.35	1.35	34.4	31.6	28	41.7	13.8	18.1	14.7	10.4	3.61	0.57	1.52	2.36	0.46	0.25	0.43	0.25
	10	13.2	23.9	12.5	16.5	12.2	17.2	28.3	33	3.2	3.1	2.78	2.21	52.6	22.5	38.3	30.9	4.79	8.52	4.36	4.41	0.07	0.054	0.089	0.086	0.24	0.17	0.21	0.18
% GFP+ cells in PEC		T cells				B cells				Neutrophils				Monocytes				Macrophages				DC1				DC2
	0	2.06	2.36	6.25		5.15	17.3	25		0	0	0		33	22	22.3		26.5	24.4	21.1		0.34	1.57	0.39		2.06	0.79	0
	5	10.8	0.63	1.42	1.45	3.6	1.88	0.47	1	0.55	1.08	0.46	0.26	65.4	80.4	78.1	82.6	0.99	2.6	4.18	2.01	0.093	0.012	0.00328	0.00624	0	0.00534	0.00109	0.00156
	10	4.5	29.5	6.71	4.57	0.56	0.28	0.18	0.21	1.91	14	1.66	1.35	63.7	37.5	78	56.3	4.61	1.17	2.04	9.7	0.023	0.02	0.011	0.00975	0.014	0.029	0.0079	0.00557
Panel D
Ratio of GFP+:tdTomato+	Hypervascularized areas	Hypovascularized areas
	0.865698	0.290657
	0.887108	0.21638
	0.809322	0.234009
	0.753745
	0.892857
Figure 3-figure supplement 1
Panel A
# GFP+ cells in BM	DPI	T cells				B cells				Neutrophils				Monocytes				Macrophages				DC1				DC2
	0	200000	224000	386000		14800	10100	35400		8790	6340	6550		140000	78300	137000		26000	17100	38000		45.2	0	0		404	300	838
	5	29900	24200	129000	80500	13300	3310	12500	13300	245000	94100	46900	49000	594000	165000	195000	277000	14000	10700	16400	7000	35.3	115	73.5	0	35.3	115	110	65.8
	10	42800	71100	23600	39600	60400	52200	28700	34000	52900	35600	32100	31100	682000	702000	390000	544000	7550	19200	3210	9630	36	194	31.7	0	71.8	0	0	0
# GFP+ cells in Spleen
		T cells				B cells				Neutrophils				Monocytes				Macrophages				DC1				DC2
	0	387000	196000	212000		59700	88400	36800		1440	573	595		113000	50900	51000		137000	170000	120000		12100	14300	8500		2240	3910	2820
	5	98600	33900	80500	106000	116000	84100	78500	159000	69700	33900	18100	19200	237000	149000	78500	238000	104000	115000	55400	77000	30200	4420	8740	19200	2600	915	983	1360
	10	2070000	1500000	3120000	2800000	1160000	595000	3800000	3620000	309000	122000	370000	263000	3300000	633000	3360000	2370000	540000	328000	793000	623000	10300	3910	14400	11000	17000	4170	16300	14300
# GFP+ cells in Blood
		T cells				B cells				Neutrophils				Monocytes				Macrophages				DC1				DC2
	0	346	38.8	68.1		1650	831	697		85.6	0	0		13200	858	1200		13500	4110	3060		85.6	0	0		510	58.2	51.1
	5	12200	1530	3050	7620	5670	3630	6870	17700	1220	272	305	936	103000	15200	24400	140000	17900	2890	12400	28100	55.2	16.8	0	0	166	16.8	0	234
	10	62900	118000	55200	55100	86400	27400	38600	43900	9260	36700	8760	2750	521000	341000	276000	147000	18200	51800	5840	4010	0	0	0	0	0	0	0	0
# GFP+ cells in PEC		T cells				B cells				Neutrophils				Monocytes				Macrophages				DC1				DC2
	0	1620	2260	4130		9280	26200	20300		0	0	0		1390	689	963		16700	34100	53700		61.7	249	43.3		231	76.4	28.9
	5	80000	1220	21900	26600	32600	6960	13700	23600	3850	2100	7490	4810	284000	92700	887000	1050000	7040	4200	53100	31100	815	31.1	125	113	0	5.83	11.4	18.8
	10	284000	687000	319000	277000	31600	7670	7190	11300	76700	267000	43400	54400	2500000	425000	1990000	2130000	272000	23700	74600	456000	1660	674	755	1030	488	347	258	207
Panel D
GFP counts	Region	1	2	3	4	5	6	7	8
	GFP+ cells	1489	1273	336	214	150	955	1258	675
tdTomato counts	Region	1	2	3	4	5	6	7	8
	tdTomato+ cells	1720	1435	1156	989	641	1180	1669	756
Figure 4
Panel B
		Naive			5 dpi
gp130 MFI cell type: MFI FMO	LTHSC	3.84076	3.05096		1.94268	1.6242
	STHSC	2.7337	1.98913		1.3913	1.18478
	MPP2	3.0442	2.03315		1.57459	1.43094
	MPP3	2.37674	1.83721		1.77674	1.63256
	MPP4	1.9234	1.51064		2.04681	1.90213
	CLP	3.09901	2.79208		3.18317	3.03465
	B, NK, T cell	1.91813	1.76608		2.73684	2.40936
	GMP	1.59434	1.35849		1.64623	1.57075
	GP	1.56705	1.52874		1.4636	1.40996
	Neut	0.534392	0.910053		0.687831	1.05291
	CMP	1.88043	1.61413		2.04891	1.90217
	MDP	2.31597	2.14583		2.04514	1.87847
	MP	1.92963	1.95185		1.81852	1.65185
	Mono	9.82036	8.41317		11.1377	8.74251
Panel C
		Naive			5 dpi
IL-27Ra MFI cell type: MFI FMO	LTHSC	69.0644	64.5372		50.9557	55.2817
	STHSC	71.9008	68.3471		20.0826	18.843
	MPP2	131.907	186.007		95.2763	104.278
	MPP3	20.6053	23.2105		13.5263	12.7105
	MPP4	12.3868	11.9094		8.64137	9.59608
	CLP	2.73256	2.66279		3.0814	3.37209
	B, NK, T cell	25.2273	25.2273		44.6212	44.0152
	GMP	7.15033	7.50327		7.32026	7.52941
	GP	1.91813	1.76608		2.73684	2.40936
	Neut	0.379968	0.777424		0.413355	0.782194
	CMP	15.6202	14.6124		14.8837	16.9574
	MDP	6.04734	5.89349		6.04734	8.4497
	MP	2.82378	3.05732		1.92994	2.80255
	Mono	0.678161	0.666667		0.896552	0.735632
Figure 5
Panel A
		Naive			5 dpi
CD132/IL-2rg MFI cell type: MFI FMO	LTHSC	1.86932	1.86364		2.43182	2.6875
	STHSC	1.66829	1.6439		1.85854	2
	MPP2	1.52535	1.75576		2.21198	2.42396
	MPP3	1.36644	1.29452		1.63014	1.84247
	MPP4	0.86438	0.798909		0.93219	1.00234
	CLP	1.27016	1.22111		1.07149	1.18371
	B, NK, T cell	1.48131	1.79907		2.47664	2.84579
	GMP	1.27751	1.32536		1.57895	1.79904
	GP	1.04298	1.1404		1.4212	1.74212
	Neut	1.04298	1.1404		1.4212	1.74212
	CMP	1.27179	1.31282		2.64615	3.38462
	MDP	0.894668	0.977893		1.14954	1.23797
	MP	0.947891	1.01241		1.15881	1.47146
	Mono	0.961872	1.08146		1.57019	1.7591
Panel B
		Naive			5 dpi
CD131 MFI cell type: MFI FMO	LTHSC	0.617188	0.509677		100.81	128.152
	STHSC	3.56818	3.09545		15.3636	19.3182
	MPP2	3.78733	0.312588		93.0769	114.208
	MPP3	2.54151	2.33716		12.1839	16.2324
	MPP4	3.89451	11.3502		46.9198	57.4262
	CLP	446.013	80.6675		59.312	93.711
	B, NK, T cell	21.6957	28.1304		34.6522	34.8261
	GMP	4.51923	5.86538		17.7596	30.3558
	GP	3.4955	3.56757		4.44144	6.15315
	Neut	21.8663	25.3691		19.9831	22.8456
	CMP	2.67483	2.51748		18.3916	27.1329
	MDP	13.5636	16.9091		29.4182	36.5455
	MP	4.84813	4.74299		6.28505	9.26402
	Mono	4.95127	5.04661		9.01907	9.09322
Panel C
		Naive			5 dpi
IL-6ra MFI cell type: MFI FMO	LTHSC	3.02296	1.55324		2.15031	1.77244
	STHSC	5.82105	1.78947		1.46737	1.10337
	MPP2	5.6594	2.85014		3.03815	2.39237
	MPP3	5.4469	64.0752		7.08407	7.17257
	MPP4	3.42105	2.65053		8.34737	8.51579
	CLP	4.91608	3.53846		4.81119	4.49301
	B, NK, T cell	3.46619	3.03559		2.32384	1.50178
	GMP	4.26389	3.5463		6.25463	5.9537
	GP	7.48241	7.54941		10.2797	10.2797
	Neut	166.891	156.814		170.767	162.24
	CMP	3.80093	2.90972		6.16204	6.09259
	MDP	14.3333	12.2895		13.6521	13.1898
	MP	11.3022	10.8705		13.7914	13.3309
	Mono	24.8772	23.9559		32.5547	32.5355
Panel D
		Naive			5 dpi
GM-CSFRa MFI cell type:MFI FMO	LTHSC	0.621622	0.653747		0.564732	0.532632
	STHSC	1.13611	1.30369		0.712085	0.666297
	MPP2	2.84828	5.86897		0.406162	0.407303
	MPP3	1.66111	0.89521		1.41706	2.18248
	MPP4	7	4.93778		0.476695	0.507901
	CLP	7.96526	13.6725		2.12159	1.07444
	B, NK, T cell	0.773148	3.41513		0.359914	0.336694
	GMP	6.42373	8.4092		1.34091	1.33656
	GP	10.0752	10.6015		9.09774	9.77444
	Neut	4.25197	4.96063		4.05512	4.68504
	CMP	1.16333	1.24643		1.33716	1.17508
	MDP	2.68519	3.14506		1.94753	1.47531
	MP	10.5161	12.0645		10.129	10.8387
	Mono	4.89388	4.96879		8.48939	8.58926
Figure 6
Panel B
	Cluster number	Cell number
	1	9532
	2	10062
	3	36559
	4	554
	5	1256
	6	2608
	7	2198
	8	4225
	9	2329
	10	14868
	11	35478
	12	2870
	13	5525
	14	2290
	15	3310
	16	2025
	17	4142
	18	4432
Panel C
Relative expression levels of markers by cluster		Ki67	CD135	CD34	Ly6G	CD115	BCL2	CD11b	MHCII	F4/80	Sca-1	CD150	CD16/32	CD117	Ly6C	CD64	CD48
	1	2175	1249	2766	1313	2120	2796	1225	955	1884	2285	888	2876	2203	1025	1014	2031
	2	2738	1175	2385	1374	1800	2966	1193	1014	1701	948	953	3162	1033	966	1013	1955
	3	1954	1266	2108	1695	2151	2651	2307	1050	2450	1055	1003	3533	976	1121	1145	2366
	10	2108	1210	2074	1960	2335	2230	3634	1446	2123	1085	956	2949	930	1449	1049	1438
	11	2079	1084	1669	2261	1891	1827	3529	1011	1760	1043	994	3007	941	2439	1030	1178
Panel E
Proportion of clusters by genotype		WT-0dpi						WT-5dpi						KO-5dpi
	1	5.72	2.31	5.87	3.48			5.4	7.59	13.7	3.02	2.1	15.6	3.98	6.33	2.94	4.06	8.44	4.82
	10	3.1	9.7	8.04	4.29			12.3	9.68	7.96	4.46	4.6	3.27	18.6	16.8	14.4	5.75	13.5	12.2
	11	1.55	7.42	8.58	1.13			39.6	41.9	26.6	47.3	2.67	0.73	32.1	25.6	28.1	27.1	35.1	29.2
Panel F	Naïve donor		Infected donor
	WT	IL-27R KO	WT	IL-27R KO
	1200000	1310000	232000	783000
	764000	1560000	332000	708000
		1750000	440000	694000
		1320000
		1680000
Figure 6-figure supplement 2
Panel A
5 dpc		WT-0dpi								WT-5dpi								27R KO-5dpi
	GM	7		5		10.5				6		4		2.5		6		4		3		0.5		1.5
	G	23.5		14		18.5				14.5		6.5		4		11		2		4		2		1.5
	M	2		0		1				1.5		1		0.5		3.5		1		0.5		1		0.5
10 dpc
		WT-0dpi								WT-5dpi								27R KO-5dpi
	GM	35		40.5		47.5				29		10.5		8		20.5		9		9		4		8.5
	G	7.5		7.5		18				4.5		1.5		1.5		0.5		1.5		0.5		0		0.5
	M	0		1		0				2		4.5		4.5		4		2		1.5		0		1.5
Panel C
Relative expression levels of markers by cluster		Ki67	CD150	CD34	Ly6G	CD135	CD115	CD117	BCL2	CD11b	MHCII	CD127	Sca-1	F4/80	CD16/32	Ly6C	CD48
	1	1125	1125	1116	998	1049	1153	1117	1344	1002	1080	941	859	960	1008	957	937
	2	1877	1778	1329	1356	939	1729	941	1215	1063	1016	922	868	931	947	951	936
	3	1521	1358	1727	1241	1256	1986	1982	1369	1035	1144	1214	887	1006	1660	977	952
	4	1656	1677	1487	1540	855	2144	921	1091	1159	1414	1018	896	945	1001	1111	985
	5	1824	2717	1344	1209	976	1908	929	1328	1015	1120	924	849	933	950	1005	936
	6	1138	2686	1046	921	1059	1058	923	1277	931	1022	875	833	924	938	933	928
	7	3338	1569	2420	1410	1983	2355	1359	1716	1154	1320	1158	1726	991	1338	1039	2219
	8	3397	1640	2122	1585	1946	3096	1505	1307	2787	2588	1302	1785	1083	1989	3355	2170
	9	3443	1544	1753	2085	1501	2296	1095	-164	3664	1112	1204	1429	1114	2031	3602	2171
	10	3379	1818	1371	1075	1079	1446	1271	2190	1060	993	1043	948	948	1043	1112	1369
	11	2850	1211	2157	1111	1161	2019	1317	2533	1444	1246	1112	1076	1174	2853	1404	2287
	12	2607	1123	1717	1118	859	1780	860	2333	2312	1198	1445	1010	1814	3498	1867	2241
	13	2153	1244	1931	1463	1203	3133	1827	2003	3568	2288	1952	1798	1722	3317	3006	2098
	14	2696	1156	1422	1837	1055	2188	1176	1038	3367	1365	1136	1141	1136	2675	3319	1716
Panel D
	Cluster	Size
	1	1138
	2	236
	3	335
	4	505
	5	383
	6	1194
	7	1063
	8	356
	9	67
	10	227
	11	166
	12	229
	13	440
	14	4468
Panel E
Cluster proportions by genotype
		WT-0dpi				WT-5dpi				KO-5dpi
	1	16	22	17.8		12.6	20.4	21.4	24.3	22	23	27.6	29.1
	2	2.4	4.6	3.4		2.2	4.6	6.4	5.52	3.6	5.4	5.6	6.21
	3	3.6	6.4	3		4.6	5.6	5.8	7.28	3.6	5.4	8.2	4.52
	4	5	9.4	6.2		4.6	9.4	10	11.3	14	7.8	14.8	11.9
	5	5.8	5.2	5.2		1.4	9.4	9.4	4.86	9.8	8.8	5.8	6.78
	6	11.4	25.2	20.4		8.2	32.4	27.2	16.3	26.2	26	20.2	24.6
	7	45.4	20.2	37.2		27.4	10.8	10.2	25.6	13	8.2	5.4	7.91
	8	8.8	3.6	4.6		13.4	5	6.6	2.21	4.8	13.4	9.2	5.93
	9	0	0	0		19.8	0	0	0	0	0.4	0	0
		WT-0dpi				WT-5dpi				KO-5dpi
	10	4	5.8	1.2		4.4	4	4.6	2.2	3	3.8	4	7.4
	11	2.2	4.4	5		2.2	0.6	1.6	1.6	1.4	1.4	0.8	1.6
	12	2.8	6.4	6.8		4.8	2.4	4.8	2.4	2.4	3.2	3.8	4.6
	13	10.6	6	28		5.2	3.6	6.2	8.4	7.2	4.6	1.6	2.8
	14	74.2	73	55.2		81.6	86.2	81	82.6	84.4	86	87.8	82.2
Figure 7
Panel A
	WT	IL-27R -/-
	2.44	0.88
	2.19	0.97
	3.26	0.95
Panel C	Naïve donor		Infected donor
	WT	IL-27R KO	WT	IL-27R KO
	2960	5330	193	1140
	2630	3620	1500	145
		5720	983	372
		2160		8.05
		1200
Figure 7-figure supplement 1
Panel B
Apoptotic	WT	IL-27R -/-
	10.6	9.93
	8.8	10.2
	20.5	15.7
	11.7	13.3
	9.43	12
Late Apopototic	WT	IL-27R -/-
	1.56	1.66
	2.46	0.94
	2.41	0.53
	1.35	0.83
	1.08	1.54
Necrotic	WT	IL-27R -/-
	0.72	0.33
	0.39	0.79
	0.3	0.8
	0.56	0.67
	0.45	0.42
